# Supplementary material
Source: PubMed Central journal article supplement (PMC7581080)
Supplement: ao0c02873_si_001.pdf [file ao0c02873_si_001.pdf]

# Supporting Information

## Theoretical study of actinide complexes with macropa

Attila Kovács

European Commission. Joint Research Centre. Postfach 2340. D-76125 Karlsruhe. Germany  
[attila.kovacs@ec.europa.eu](mailto:attila.kovacs@ec.europa.eu). ORCID: 0000-0001-8169-3547

### Content:

|            |                                                                                                                                                                                                                                       |              |
|------------|---------------------------------------------------------------------------------------------------------------------------------------------------------------------------------------------------------------------------------------|--------------|
| Table S1.  | Relative Gibbs free energies (kJ/mol) of the eight $M(L)^+$ complexes in the gaseous phase and aqueous solution.                                                                                                                      | S2           |
| Table S2.  | Selected bond distances ( $\text{\AA}$ ) of the $\Delta(\delta\lambda\delta)(\delta\lambda\delta)$ and $\Delta(\lambda\delta\lambda)(\lambda\delta\lambda)$ conformers.                                                               | S3           |
| Table S3.  | Selected topological properties of the of the $\Delta(\delta\lambda\delta)(\delta\lambda\delta)$ and $\Delta(\lambda\delta\lambda)(\lambda\delta\lambda)$ conformers from QTAIM analysis of the TPSSh/SCPP wavefunctions.             | S4           |
| Figure S1. | Strain energy of the macropa ( $L^{2-}$ ) $\Delta(\delta\lambda\delta)(\delta\lambda\delta)$ and $\Delta(\lambda\delta\lambda)(\lambda\delta\lambda)$ conformers in the optimized structures of the respective complexes.             | S5           |
| Figure S2. | Electron density distribution ( $\rho$ , au) at the given bond critical points of the $\Delta(\delta\lambda\delta)(\delta\lambda\delta)$ and $\Delta(\lambda\delta\lambda)(\lambda\delta\lambda)$ complexes.                          | S5           |
| Figure S3. | Laplacian of the electron density distribution ( $\nabla^2\rho$ , au) at the given bond critical points of the $\Delta(\delta\lambda\delta)(\delta\lambda\delta)$ and $\Delta(\lambda\delta\lambda)(\lambda\delta\lambda)$ complexes. | S6           |
| Figure S4. | Optimized PCM radii compared with the ionic radii in the crystal (coordination number = 6).<br>Cartesian coordinates of the $Ac(L)^+$ and $Cf(L)^+$ conformers optimized at the TPSSh/SCPP level.                                     | S6<br>S7-S18 |

Table S1. Relative Gibbs free energies (kJ/mol) of the eight M(L)<sup>+</sup> complexes in the gaseous phase and aqueous solution obtained at the TPSSh/LCPP and TPSSh/SCPP levels, respectively. For technical details see text.

| Conf <sup>a</sup> | Ac(L) <sup>+</sup> |      | La(L) <sup>+</sup> |      | Cf(L) <sup>+</sup> |      | Lu(L) <sup>+</sup> |      |
|-------------------|--------------------|------|--------------------|------|--------------------|------|--------------------|------|
|                   | LCPP               | SCPP | LCPP               | SCPP | LCPP               | SCPP | LCPP               | SCPP |
| Gas               |                    |      |                    |      |                    |      |                    |      |
| δδδ               | 20.2               | 25.2 |                    |      | 7.2                |      |                    |      |
| δδλ               | 31.3               | 32.5 |                    |      | 18.8               |      |                    |      |
| δλδ               | 0.0                | 0.0  | 0.0                | 0.0  | 4.1                | 8.3  | 16.0               | 17.1 |
| δλλ               | 18.4               | 21.0 |                    |      | 8.4                | 13.8 |                    |      |
| λδδ               | 35.2               | 36.7 |                    |      | 24.9               | 28.5 |                    |      |
| λδλ               | 11.4               | 14.3 | 6.4                | 2.6  | 0.0                | 0.0  | 0.0                | 0.0  |
| λλδ               | 36.1               | 34.7 |                    |      | 31.4               |      |                    |      |
| λλλ               | 25.7               | 28.0 |                    |      | 11.6               |      |                    |      |
| Gas+BSSE          |                    |      |                    |      |                    |      |                    |      |
| δδδ               | 18.4               |      |                    |      | 7.8                |      |                    |      |
| δδλ               | 31.4               |      |                    |      | 19.4               |      |                    |      |
| δλδ               | 0.0                |      | 0.0                | 0.0  | 8.7                |      | 21.5               | 19.5 |
| δλλ               | 16.6               |      |                    |      | 11.4               |      |                    |      |
| λδδ               | 34.5               |      |                    |      | 27.1               |      |                    |      |
| λδλ               | 12.5               |      | 4.0                | 0.8  | 0.0                |      | 0.0                | 0.0  |
| λλδ               | 33.6               |      |                    |      | 30.2               |      |                    |      |
| λλλ               | 23.2               |      |                    |      | 12.2               |      |                    |      |
| Solution          |                    |      |                    |      |                    |      |                    |      |
| δδδ               | 30.8               | 31.1 |                    |      | 2.7                |      |                    |      |
| δδλ               | 18.8               | 25.0 |                    |      | 28.7               |      |                    |      |
| δλδ               | 0.0                | 0.0  | 0.0                | 0.0  | 0.0                | 0.0  | 0.0                | 0.0  |
| δλλ               | 24.9               | 15.8 |                    |      | 9.4                | 3.7  |                    |      |
| λδδ               | 49.0               | 40.1 |                    |      | 31.1               | 17.1 |                    |      |
| λδλ               | 11.5               | 12.4 | 30.7               | 24.5 | 12.8               | 4.8  | 13.7               | 7.7  |
| λλδ               | 52.1               | 38.1 |                    |      | 29.8               |      |                    |      |
| λλλ               | 37.3               | 36.7 |                    |      | 25.4               |      |                    |      |

<sup>a</sup>The conformers Δ(yyy)(yyy) are abbreviated by the yyy terms.

Table S2. Selected bond distances (Å) of the  $\Delta(\delta\lambda\delta)(\delta\lambda\delta)$  and  $\Delta(\lambda\delta\lambda)(\lambda\delta\lambda)$  conformers computed with the TPSSh functional.

|                          | Method <sup>a</sup> | M-O <sub>1</sub> | M-O <sub>2</sub> | M-O <sub>3</sub> | M-N <sub>1</sub> | M-N <sub>2</sub> |
|--------------------------|---------------------|------------------|------------------|------------------|------------------|------------------|
| <b>Ac(L)<sup>+</sup></b> |                     |                  |                  |                  |                  |                  |
| $\delta\lambda\delta$    | LCPP                | 2.441            | 2.804            | 2.883            | 2.742            | 2.991            |
|                          | LCPP+BSSE           | 2.439            | 2.814            | 2.905            | 2.742            | 3.001            |
|                          | SCPP                | 2.431            | 2.817            | 2.895            | 2.736            | 2.996            |
| $\lambda\delta\lambda$   | LCPP                | 2.444            | 2.847            | 2.791            | 2.762            | 2.988            |
|                          | LCPP+BSSE           | 2.448            | 2.848            | 2.785            | 2.751            | 2.982            |
|                          | SCPP                | 2.430            | 2.863            | 2.802            | 2.756            | 2.995            |
| <b>La(L)<sup>+</sup></b> |                     |                  |                  |                  |                  |                  |
| $\delta\lambda\delta$    | Exp. <sup>b</sup>   | 2.53/2.55        | 2.70/2.73        | 2.79             | 2.76/2.78        | 2.90/2.94        |
|                          | LCPP                | 2.369            | 2.747            | 2.854            | 2.672            | 2.957            |
|                          | LCPP+BSSE           | 2.364            | 2.762            | 2.889            | 2.672            | 2.971            |
|                          | SCPP                | 2.335            | 2.752            | 2.865            | 2.669            | 2.966            |
|                          | SCPP+BSSE           | 2.334            | 2.761            | 2.885            | 2.668            | 2.975            |
| $\lambda\delta\lambda$   | LCPP                | 2.387            | 2.734            | 2.684            | 2.676            | 2.933            |
|                          | LCPP+BSSE           | 2.391            | 2.738            | 2.678            | 2.671            | 2.923            |
|                          | SCPP                | 2.355            | 2.746            | 2.677            | 2.671            | 2.938            |
|                          | SCPP+BSSE           | 2.360            | 2.739            | 2.675            | 2.668            | 2.930            |
| <b>Cf(L)<sup>+</sup></b> |                     |                  |                  |                  |                  |                  |
| $\delta\lambda\delta$    | LCPP                | 2.302            | 2.683            | 2.829            | 2.597            | 2.933            |
|                          | LCPP+BSSE           | 2.298            | 2.688            | 2.855            | 2.594            | 2.944            |
|                          | SCPP                | 2.250            | 2.667            | 2.833            | 2.566            | 2.930            |
| $\lambda\delta\lambda$   | LCPP                | 2.329            | 2.649            | 2.609            | 2.597            | 2.900            |
|                          | LCPP+BSSE           | 2.330            | 2.657            | 2.604            | 2.593            | 2.890            |
|                          | SCPP                | 2.277            | 2.633            | 2.584            | 2.564            | 2.889            |
| <b>Lu(L)<sup>+</sup></b> |                     |                  |                  |                  |                  |                  |
| $\delta\lambda\delta$    | LCPP                | 2.182            | 2.596            | 2.812            | 2.518            | 2.942            |
|                          | LCPP+BSSE           | 2.178            | 2.569            | 2.836            | 2.516            | 2.975            |
|                          | SCPP                | 2.158            | 2.581            | 2.819            | 2.498            | 2.943            |
|                          | SCPP+BSSE           | 2.158            | 2.579            | 2.843            | 2.490            | 2.950            |
| $\lambda\delta\lambda$   | Exp. <sup>b</sup>   | 2.24/2.25        | 2.45/2.50        | 2.46/2.49        | 2.49             | 2.81/2.91        |
|                          | LCPP                | 2.213            | 2.559            | 2.524            | 2.518            | 2.903            |
|                          | LCPP+BSSE           | 2.213            | 2.566            | 2.527            | 2.516            | 2.896            |
|                          | SCPP                | 2.190            | 2.547            | 2.508            | 2.500            | 2.907            |
|                          | SCPP+BSSE           | 2.193            | 2.549            | 2.509            | 2.495            | 2.904            |

<sup>a</sup>When SCF converge errors did not hinder, the optimizations have also been performed taking into account the basis set superposition effect (BSSE).

<sup>b</sup>From Ref. Angew. Chem. Int. Ed., 2017, 56, 14712-14717. The crystal structures correspond to [La(HL)(H<sub>2</sub>O)]·(ClO<sub>4</sub>)<sub>2</sub> and [Lu(L)]·ClO<sub>4</sub>·DMF.

Table S3. Selected topological properties of the of the  $\Delta(\delta\lambda\delta)(\delta\lambda\delta)$  and  $\Delta(\lambda\delta\lambda)(\lambda\delta\lambda)$  conformers from QTAIM analysis of the TPPSSh/SCPP wavefunctions.

| Property                 |                | M-O <sub>1</sub> | M-O <sub>2</sub> | M-O <sub>3</sub> | M-N <sub>1</sub> | M-N <sub>2</sub> |
|--------------------------|----------------|------------------|------------------|------------------|------------------|------------------|
| <b>Ac(L)<sup>+</sup></b> |                |                  |                  |                  |                  |                  |
| $\delta\lambda\delta$    | DI             | 0.375            | 0.157            | 0.137            | 0.223            | 0.147            |
|                          | $\rho$         | 0.060            | 0.026            | 0.024            | 0.037            | 0.024            |
|                          | $\nabla^2\rho$ | 0.207            | 0.087            | 0.072            | 0.106            | 0.061            |
| $\lambda\delta\lambda$   | DI             | 0.379            | 0.144            | 0.155            | 0.219            | 0.146            |
|                          | $\rho$         | 0.060            | 0.025            | 0.027            | 0.036            | 0.024            |
|                          | $\nabla^2\rho$ | 0.209            | 0.078            | 0.091            | 0.102            | 0.061            |
| <b>La(L)<sup>+</sup></b> |                |                  |                  |                  |                  |                  |
| $\delta\lambda\delta$    | DI             | 0.423            | 0.152            | 0.123            | 0.229            | 0.139            |
|                          | $\rho$         | 0.069            | 0.027            | 0.022            | 0.039            | 0.023            |
|                          | $\nabla^2\rho$ | 0.242            | 0.095            | 0.072            | 0.114            | 0.060            |
| $\lambda\delta\lambda$   | DI             | 0.404            | 0.155            | 0.168            | 0.228            | 0.143            |
|                          | $\rho$         | 0.066            | 0.028            | 0.031            | 0.039            | 0.024            |
|                          | $\nabla^2\rho$ | 0.235            | 0.095            | 0.114            | 0.115            | 0.064            |
| <b>Cf(L)<sup>+</sup></b> |                |                  |                  |                  |                  |                  |
| $\delta\lambda\delta$    | DI             | 0.458            | 0.166            | 0.118            | 0.262            | 0.136            |
|                          | $\rho$         | 0.077            | 0.029            | 0.022            | 0.045            | 0.022            |
|                          | $\nabla^2\rho$ | 0.330            | 0.110            | 0.072            | 0.147            | 0.062            |
| $\lambda\delta\lambda$   | DI             | 0.428            | 0.177            | 0.186            | 0.260            | 0.144            |
|                          | $\rho$         | 0.073            | 0.032            | 0.035            | 0.045            | 0.024            |
|                          | $\nabla^2\rho$ | 0.310            | 0.122            | 0.141            | 0.150            | 0.069            |
| <b>Lu(L)<sup>+</sup></b> |                |                  |                  |                  |                  |                  |
| $\delta\lambda\delta$    | DI             | 0.387            | 0.131            | 0.076            | 0.209            | 0.086            |
|                          | $\rho$         | 0.079            | 0.027            | 0.017            | 0.042            | 0.017            |
|                          | $\nabla^2\rho$ | 0.361            | 0.112            | 0.062            | 0.143            | 0.052            |
| $\lambda\delta\lambda$   | DI             | 0.353            | 0.139            | 0.144            | 0.205            | 0.089            |
|                          | $\rho$         | 0.073            | 0.030            | 0.032            | 0.041            | 0.018            |
|                          | $\nabla^2\rho$ | 0.333            | 0.125            | 0.140            | 0.144            | 0.057            |

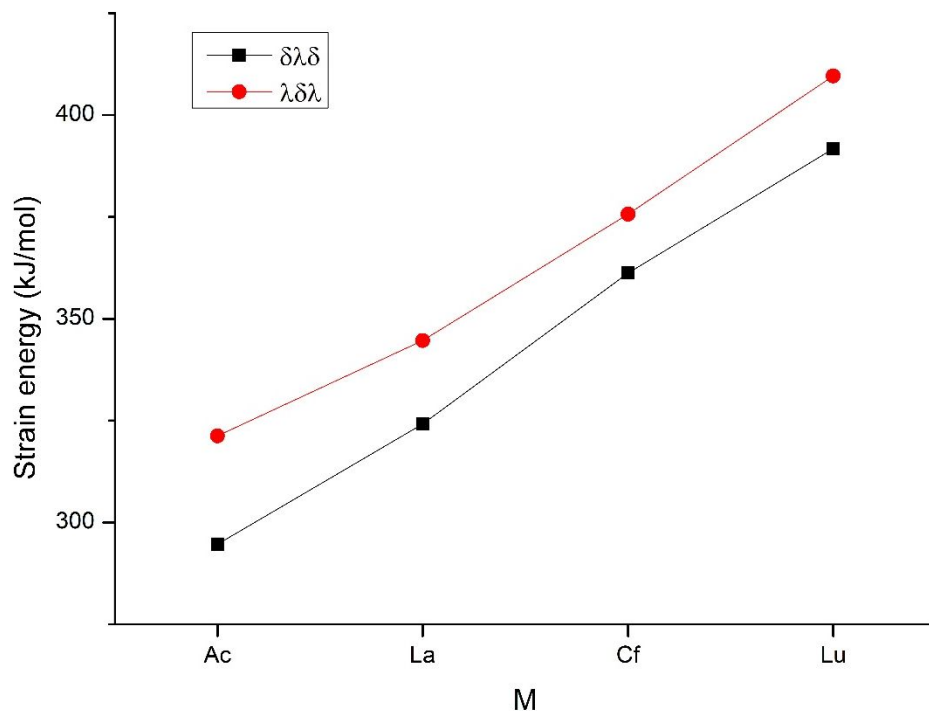

Figure S1. Strain energy of the macropa ( $L^{2-}$ )  $\Delta(\delta\lambda\delta)(\delta\lambda\delta)$  and  $\Delta(\lambda\delta\lambda)(\lambda\delta\lambda)$  conformers in the optimized structures of the respective complexes.

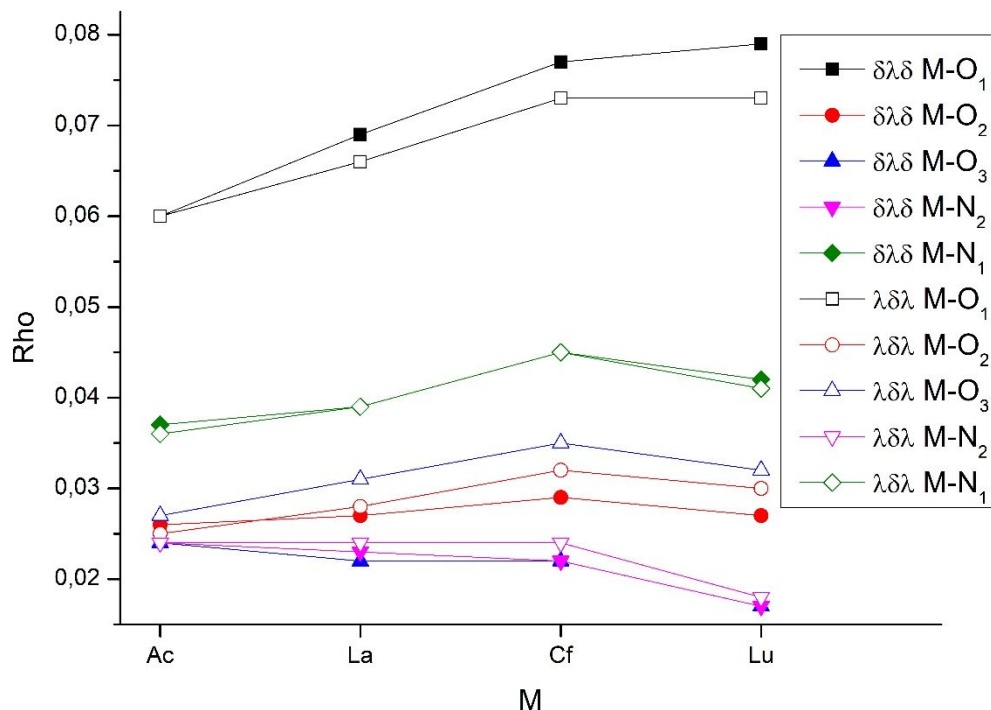

Figure S2. Electron density distribution ( $\rho$ , au) at the given bond critical points of the  $\Delta(\delta\lambda\delta)(\delta\lambda\delta)$  and  $\Delta(\lambda\delta\lambda)(\lambda\delta\lambda)$  complexes.

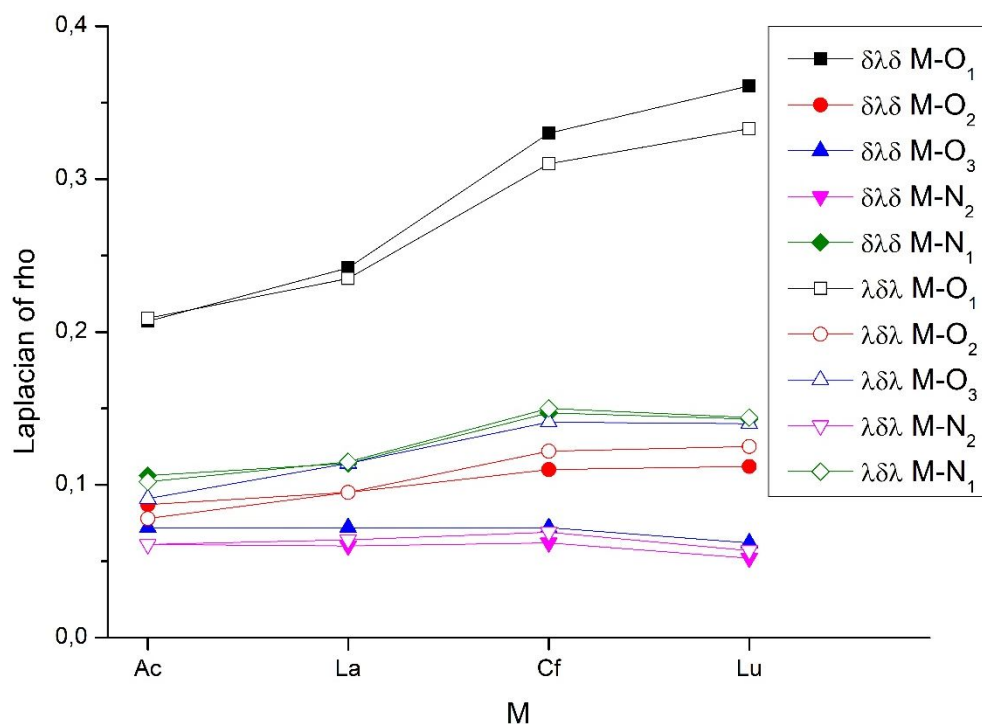

Figure S3. Laplacian of the electron density distribution ( $\nabla^2\rho$ , au) at the given bond critical points of the  $\Delta(\delta\lambda\delta)(\delta\lambda\delta)$  and  $\Delta(\lambda\delta\lambda)(\lambda\delta\lambda)$  complexes.

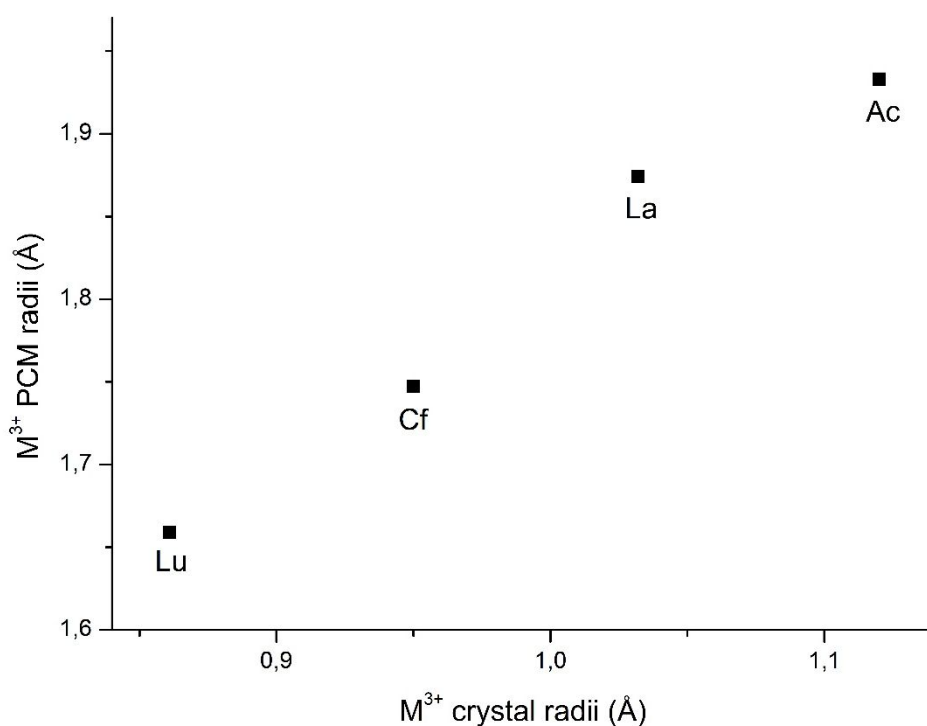

Figure S4. Optimized PCM radii compared with the ionic radii in the crystal (coordination number = 6; no radii for CN=9 are available for  $\text{Ac}^{3+}$  and  $\text{Cf}^{3+}$ ).

**Cartesian coordinates****Ac(L)<sup>+</sup> Δ(δδδ)(δδδ)**

|    |           |           |           |
|----|-----------|-----------|-----------|
| 89 | 0.000000  | 0.000000  | 0.473759  |
| 8  | 2.079871  | 0.365984  | -0.747822 |
| 8  | -2.079871 | -0.365984 | -0.747822 |
| 8  | -1.087955 | -2.279796 | 1.590594  |
| 8  | 2.032521  | -0.264731 | 2.450193  |
| 8  | 1.087955  | 2.279796  | 1.590594  |
| 8  | -2.032521 | 0.264731  | 2.450193  |
| 7  | 1.596773  | -2.514316 | 0.634471  |
| 7  | -1.596773 | 2.514316  | 0.634471  |
| 7  | -0.018965 | -1.844085 | -1.510177 |
| 7  | 0.018965  | 1.844085  | -1.510177 |
| 8  | 3.211244  | 0.807920  | -2.661566 |
| 8  | -3.211244 | -0.807920 | -2.661566 |
| 6  | 0.741540  | -3.676214 | 0.987678  |
| 6  | -0.259003 | -3.346258 | 2.085227  |
| 6  | 2.712039  | -2.394317 | 1.609272  |
| 6  | 3.154754  | -0.960366 | 1.842770  |
| 6  | 2.387620  | 0.950836  | 3.138270  |
| 6  | 2.392922  | 2.135478  | 2.184963  |
| 6  | -2.387620 | -0.950836 | 3.138270  |
| 6  | -2.392922 | -2.135478 | 2.184963  |
| 6  | -2.712039 | 2.394317  | 1.609272  |
| 6  | -3.154754 | 0.960366  | 1.842770  |
| 6  | 0.259003  | 3.346258  | 2.085227  |
| 6  | -0.741540 | 3.676214  | 0.987678  |
| 6  | 2.134140  | -2.671739 | -0.745935 |
| 6  | -2.134140 | 2.671739  | -0.745935 |
| 6  | -1.025889 | 2.648135  | -1.779520 |
| 6  | 1.025889  | -2.648135 | -1.779520 |
| 6  | 1.067544  | 1.796105  | -2.354465 |
| 6  | 1.093484  | 2.523809  | -3.545374 |
| 6  | 0.000000  | 3.337030  | -3.846952 |
| 6  | -1.067439 | 3.416514  | -2.946794 |
| 6  | 1.067439  | -3.416514 | -2.946794 |
| 6  | 0.000000  | -3.337030 | -3.846952 |
| 6  | -1.093484 | -2.523809 | -3.545374 |
| 6  | -1.067544 | -1.796105 | -2.354465 |
| 1  | 3.366195  | 0.833232  | 3.620451  |
| 1  | 1.630080  | 1.085051  | 3.916125  |
| 1  | 3.086355  | 1.969850  | 1.356093  |
| 1  | 2.674860  | 3.055337  | 2.710148  |
| 1  | -3.366195 | -0.833232 | 3.620451  |
| 1  | -1.630080 | -1.085051 | 3.916125  |
| 1  | -2.674860 | -3.055337 | 2.710148  |
| 1  | -3.086355 | -1.969850 | 1.356093  |
| 1  | 2.709548  | -3.606568 | -0.837648 |
| 1  | 2.806503  | -1.827498 | -0.933334 |
| 1  | -2.709548 | 3.606568  | -0.837648 |

|   |           |           |           |
|---|-----------|-----------|-----------|
| 1 | -2.806503 | 1.827498  | -0.933334 |
| 1 | 1.961574  | 2.441395  | -4.189047 |
| 1 | -0.016908 | 3.919659  | -4.762813 |
| 1 | -1.915777 | 4.063897  | -3.144427 |
| 1 | 1.915777  | -4.063897 | -3.144427 |
| 1 | 0.016908  | -3.919659 | -4.762813 |
| 1 | -1.961574 | -2.441395 | -4.189047 |
| 6 | 2.238208  | 0.923375  | -1.921145 |
| 6 | -2.238208 | -0.923375 | -1.921145 |
| 1 | 1.350090  | -4.542324 | 1.292813  |
| 1 | -0.877442 | -4.229316 | 2.285226  |
| 1 | 0.228363  | -3.043841 | 3.021974  |
| 1 | -1.350090 | 4.542324  | 1.292813  |
| 1 | -0.173989 | 3.963066  | 0.099971  |
| 1 | 0.877442  | 4.229316  | 2.285226  |
| 1 | -0.228363 | 3.043841  | 3.021974  |
| 1 | -3.438637 | 0.460186  | 0.910976  |
| 1 | -3.996589 | 0.953114  | 2.545853  |
| 1 | -2.374628 | 2.799068  | 2.567970  |
| 1 | -3.577958 | 2.993266  | 1.288166  |
| 1 | 3.996589  | -0.953114 | 2.545853  |
| 1 | 3.438637  | -0.460186 | 0.910976  |
| 1 | 3.577958  | -2.993266 | 1.288166  |
| 1 | 2.374628  | -2.799068 | 2.567970  |
| 1 | 0.173989  | -3.963066 | 0.099971  |

| Ac(L) <sup>+</sup> | $\Delta(\delta\delta\lambda)$ | $(\delta\delta\lambda)$ |   |           |           |           |
|--------------------|-------------------------------|-------------------------|---|-----------|-----------|-----------|
|                    |                               |                         | 1 | -1.721081 | -0.638798 | -3.168587 |
|                    |                               |                         | 1 | -3.279376 | -1.511821 | -3.155011 |
|                    |                               |                         | 1 | -2.199378 | -3.468774 | -2.073951 |
|                    |                               |                         | 1 | -1.348028 | -2.990240 | -3.557246 |
|                    |                               |                         | 1 | 4.023900  | 1.423518  | 1.788272  |
|                    |                               |                         | 1 | 2.284896  | 1.529027  | 2.188024  |
|                    |                               |                         | 1 | -4.165270 | 0.569153  | -1.942579 |
|                    |                               |                         | 1 | -2.499039 | 1.103566  | -2.275179 |
|                    |                               |                         | 1 | -2.807588 | 3.613944  | 2.894850  |
|                    |                               |                         | 1 | -4.860290 | 3.865730  | 1.423892  |
|                    |                               |                         | 1 | -5.045096 | 2.436514  | -0.621276 |
|                    |                               |                         | 1 | 4.281886  | 3.617266  | 0.659686  |
|                    |                               |                         | 1 | 3.697988  | 5.048588  | -1.305480 |
|                    |                               |                         | 1 | 1.831244  | 4.292735  | -2.847789 |
|                    |                               |                         | 6 | -0.725987 | 1.897179  | 2.484125  |
|                    |                               |                         | 6 | 0.335853  | 2.013517  | -2.576987 |
|                    |                               |                         | 1 | 3.763532  | 0.159090  | -0.709130 |
|                    |                               |                         | 1 | 4.794090  | -0.593512 | 0.518384  |
|                    |                               |                         | 1 | 4.139272  | -2.004934 | -1.476836 |
|                    |                               |                         | 1 | 3.847789  | -2.787058 | 0.086126  |
|                    |                               |                         | 1 | -4.240693 | -2.072456 | -1.047572 |
|                    |                               |                         | 1 | -4.074326 | -0.812818 | 0.184279  |
|                    |                               |                         | 1 | -3.577419 | -2.936554 | 1.174232  |
|                    |                               |                         | 1 | -2.292658 | -3.296784 | 0.000558  |
| 89                 | 0.059559                      | -0.276653               |   |           |           | -0.046733 |
| 8                  | 0.071570                      | 0.964871                |   |           |           | 2.036707  |
| 8                  | -0.158982                     | 0.869578                |   |           |           | -2.183282 |
| 8                  | 2.145532                      | -2.101536               |   |           |           | -0.879720 |
| 8                  | 0.743765                      | -2.072057               |   |           |           | 1.988965  |
| 8                  | -1.893529                     | -1.726162               |   |           |           | 1.310611  |
| 8                  | -0.387049                     | -2.477024               |   |           |           | -1.785973 |
| 7                  | 2.772211                      | -0.175526               |   |           |           | 1.084031  |
| 7                  | -2.585636                     | -0.728842               |   |           |           | -1.284350 |
| 7                  | 1.760055                      | 1.780799                |   |           |           | -0.612849 |
| 7                  | -2.053618                     | 1.369572                |   |           |           | 0.505843  |
| 8                  | -0.572414                     | 2.571851                |   |           |           | 3.499246  |
| 8                  | -0.016312                     | 2.672468                |   |           |           | -3.551308 |
| 6                  | 3.779995                      | -0.592899               |   |           |           | 0.083100  |
| 6                  | 3.540936                      | -1.953619               |   |           |           | -0.558591 |
| 6                  | 2.833538                      | -0.944781               |   |           |           | 2.351211  |
| 6                  | 2.118466                      | -2.293795               |   |           |           | 2.337133  |
| 6                  | -0.204290                     | -3.007767               |   |           |           | 2.517724  |
| 6                  | -1.532120                     | -2.272197               |   |           |           | 2.592541  |
| 6                  | 0.504642                      | -3.601215               |   |           |           | -1.787763 |
| 6                  | 1.926388                      | -3.089796               |   |           |           | -1.901038 |
| 6                  | -2.335525                     | -1.347885               |   |           |           | -2.607488 |
| 6                  | -1.600081                     | -2.673775               |   |           |           | -2.537506 |
| 6                  | -2.819540                     | -2.487987               |   |           |           | 0.519683  |
| 6                  | -3.512559                     | -1.517646               |   |           |           | -0.434441 |
| 6                  | 3.003761                      | 1.264476                |   |           |           | 1.405173  |
| 6                  | -3.146655                     | 0.629937                |   |           |           | -1.529426 |
| 6                  | -3.140582                     | 1.482166                |   |           |           | -0.280866 |
| 6                  | 2.754035                      | 2.160607                |   |           |           | 0.211902  |
| 6                  | -1.961835                     | 2.117523                |   |           |           | 1.622739  |
| 6                  | -2.947132                     | 3.037201                |   |           |           | 1.987862  |
| 6                  | -4.070437                     | 3.165054                |   |           |           | 1.171295  |
| 6                  | -4.176707                     | 2.369153                |   |           |           | 0.026357  |
| 6                  | 3.479547                      | 3.333809                |   |           |           | -0.013942 |
| 6                  | 3.151068                      | 4.130187                |   |           |           | -1.115690 |
| 6                  | 2.126020                      | 3.726332                |   |           |           | -1.972014 |
| 6                  | 1.456480                      | 2.535105                |   |           |           | -1.687791 |
| 1                  | 2.338588                      | -0.333989               |   |           |           | 3.110031  |
| 1                  | 3.877979                      | -1.104904               |   |           |           | 2.667486  |
| 1                  | 2.174924                      | -2.709716               |   |           |           | 3.351106  |
| 1                  | 2.558571                      | -3.020876               |   |           |           | 1.647239  |
| 1                  | 0.095158                      | -3.319134               |   |           |           | 3.526758  |
| 1                  | -0.258174                     | -3.900344               |   |           |           | 1.878713  |
| 1                  | -1.432018                     | -1.414235               |   |           |           | 3.261123  |
| 1                  | -2.325192                     | -2.932907               |   |           |           | 2.960905  |
| 1                  | 0.292252                      | -4.253848               |   |           |           | -2.642503 |
| 1                  | 0.366755                      | -4.178370               |   |           |           | -0.864599 |
| 1                  | 2.618634                      | -3.930942               |   |           |           | -1.765734 |
| 1                  | 2.101985                      | -2.635218               |   |           |           | -2.883467 |



| Ac(L) <sup>+</sup> Δ(δλδ)(δλδ) |             |             |             |   |             |            |             |
|--------------------------------|-------------|-------------|-------------|---|-------------|------------|-------------|
|                                |             |             |             | H | -4.76662400 | 1.16724700 | -0.27204800 |
|                                |             |             |             | H | -3.75810500 | 2.44239100 | -2.11103700 |
|                                |             |             |             | H | -3.21606200 | 3.14219700 | -0.57192300 |
|                                |             |             |             | H | 4.76619100  | 1.16874500 | 0.27203100  |
|                                |             |             |             | H | 3.66101500  | 0.18088900 | 1.24541700  |
|                                |             |             |             | H | 3.75726400  | 2.44350600 | 2.11105600  |
|                                |             |             |             | H | 3.21498300  | 3.14317400 | 0.57196200  |
|                                |             |             |             | H | 1.88237300  | 0.60111600 | -3.23468000 |
|                                |             |             |             | H | 2.43902300  | 2.25653100 | -3.64279000 |
|                                |             |             |             | H | 3.34961500  | 2.54234700 | -1.38014200 |
|                                |             |             |             | H | 4.17025100  | 1.25851100 | -2.27372200 |
|                                |             |             |             | H | -2.43980400 | 2.25564500 | 3.64282200  |
|                                |             |             |             | H | -1.88262800 | 0.60042300 | 3.23464700  |
|                                |             |             |             | H | -4.17072000 | 1.25711500 | 2.27372600  |
|                                |             |             |             | H | -3.35050400 | 2.54125600 | 1.38019600  |
|                                |             |             |             | H | -1.04805500 | 3.89272200 | -2.04023600 |
|                                |             |             |             | H | -2.05600800 | 3.13632300 | -3.30458400 |
|                                |             |             |             | H | -0.33459800 | 1.37866300 | -3.66235600 |
|                                |             |             |             | H | 0.29195900  | 3.02789700 | -3.97298600 |
|                                |             |             |             | H | -3.66111900 | 0.17978400 | -1.24546000 |
|                                |             |             |             | H | 2.05495000  | 3.13687000 | 3.30461500  |
|                                |             |             |             | H | 1.04675100  | 3.89296600 | 2.04027900  |
|                                |             |             |             | H | -0.29297400 | 3.02768100 | 3.97302700  |
|                                |             |             |             | H | 0.33408800  | 1.37864900 | 3.66234000  |
| Ac                             | -0.00005100 | 0.51782300  | 0.00011800  |   |             |            |             |
| O                              | -0.39323400 | -0.73700700 | 2.04431400  |   |             |            |             |
| O                              | 0.39350700  | -0.73659900 | -2.04426500 |   |             |            |             |
| O                              | -1.79964600 | 2.00023400  | -1.58158900 |   |             |            |             |
| O                              | -0.94007600 | 2.13600200  | 2.20933400  |   |             |            |             |
| O                              | 1.79894700  | 2.00072200  | 1.58160700  |   |             |            |             |
| O                              | 0.93932500  | 2.13636100  | -2.20931800 |   |             |            |             |
| N                              | -2.91946100 | 0.61129100  | 0.66517700  |   |             |            |             |
| N                              | 2.91920400  | 0.61221200  | -0.66520300 |   |             |            |             |
| N                              | -1.71590800 | -1.50579900 | -0.66609200 |   |             |            |             |
| N                              | 1.71637600  | -1.50540200 | 0.66597100  |   |             |            |             |
| O                              | -0.47289500 | -2.68759800 | 3.19310900  |   |             |            |             |
| O                              | 0.47376400  | -2.68699900 | -3.19334100 |   |             |            |             |
| C                              | -3.70663800 | 1.00229200  | -0.52788000 |   |             |            |             |
| C                              | -3.16590300 | 2.24861600  | -1.20760200 |   |             |            |             |
| C                              | -3.22232100 | 1.53434300  | 1.78606100  |   |             |            |             |
| C                              | -2.12634200 | 1.58777500  | 2.82949200  |   |             |            |             |
| C                              | 0.07849300  | 2.34028800  | 3.20075000  |   |             |            |             |
| C                              | 1.29189500  | 2.94645000  | 2.53942400  |   |             |            |             |
| C                              | -0.07930200 | 2.34036600  | -3.20073300 |   |             |            |             |
| C                              | -1.29289500 | 2.94613500  | -2.53939500 |   |             |            |             |
| C                              | 3.22176000  | 1.53540900  | -1.78604900 |   |             |            |             |
| C                              | 2.12577000  | 1.58853000  | -2.82948500 |   |             |            |             |
| C                              | 3.16512100  | 2.24956100  | 1.20761900  |   |             |            |             |
| C                              | 3.70626000  | 1.00343200  | 0.52786100  |   |             |            |             |
| C                              | -3.26389900 | -0.78050100 | 1.06106400  |   |             |            |             |
| C                              | 3.26410700  | -0.77944800 | -1.06115400 |   |             |            |             |
| C                              | 2.84023800  | -1.78919700 | -0.01734100 |   |             |            |             |
| C                              | -2.83966500 | -1.79004600 | 0.01720400  |   |             |            |             |
| C                              | 1.28020600  | -2.35847600 | 1.61451700  |   |             |            |             |
| C                              | 1.93508000  | -3.55742600 | 1.89765500  |   |             |            |             |
| C                              | 3.09322900  | -3.86335600 | 1.18163100  |   |             |            |             |
| C                              | 3.56201900  | -2.96303900 | 0.22080600  |   |             |            |             |
| C                              | -3.56102100 | -2.96413400 | -0.22101600 |   |             |            |             |
| C                              | -3.09190900 | -3.86421600 | -1.18190500 |   |             |            |             |
| C                              | -1.93387400 | -3.55781500 | -1.89791700 |   |             |            |             |
| C                              | -1.27943200 | -2.35864900 | -1.61469500 |   |             |            |             |
| H                              | -4.34505800 | -0.87341200 | 1.25256900  |   |             |            |             |
| H                              | -2.72613500 | -1.00156800 | 1.98888900  |   |             |            |             |
| H                              | 4.34529200  | -0.87198400 | -1.25268900 |   |             |            |             |
| H                              | 2.72639600  | -1.00064800 | -1.98897800 |   |             |            |             |
| H                              | 1.52856400  | -4.20485000 | 2.66595000  |   |             |            |             |
| H                              | 3.63478500  | -4.78400900 | 1.37555800  |   |             |            |             |
| H                              | 4.47055700  | -3.16605000 | -0.33697600 |   |             |            |             |
| H                              | -4.46948600 | -3.16750900 | 0.33675200  |   |             |            |             |
| H                              | -3.63313200 | -4.78505200 | -1.37589000 |   |             |            |             |
| H                              | -1.52712600 | -4.20503600 | -2.66626100 |   |             |            |             |
| C                              | 0.03272100  | -1.92909600 | 2.36928600  |   |             |            |             |
| C                              | -0.03209800 | -1.92876400 | -2.36942400 |   |             |            |             |

Ac(L)<sup>+</sup> Δ(δλλ)(δλλ)

|    |           |           |           |   |           |           |          |
|----|-----------|-----------|-----------|---|-----------|-----------|----------|
|    |           |           |           | 1 | 1.642728  | -4.408684 | 1.269820 |
|    |           |           |           | 1 | -0.605714 | -4.249264 | 2.311238 |
| 89 | 0.000000  | 0.000000  | 0.420114  | 1 | 0.521794  | -3.128762 | 3.089971 |
| 8  | 2.149998  | 0.297523  | -0.702350 | 1 | -1.642728 | 4.408684  | 1.269820 |
| 8  | -2.149998 | -0.297523 | -0.702350 | 1 | -0.322675 | 4.006358  | 0.164070 |
| 8  | -0.865747 | -2.248374 | 1.824835  | 1 | 0.605714  | 4.249264  | 2.311238 |
| 8  | 1.986319  | -0.235377 | 2.446041  | 1 | -0.521794 | 3.128762  | 3.089971 |
| 8  | 0.865747  | 2.248374  | 1.824835  | 1 | -1.576275 | -1.998183 | 3.764655 |
| 8  | -1.986319 | 0.235377  | 2.446041  | 1 | -2.571540 | -3.044996 | 2.707996 |
| 7  | 1.658298  | -2.431714 | 0.440206  | 1 | -3.182583 | -1.051176 | 1.317784 |
| 7  | -1.658298 | 2.431714  | 0.440206  | 1 | -3.655075 | -0.864613 | 3.040290 |
| 7  | -0.214098 | -1.893904 | -1.544262 | 1 | 0.322675  | -4.006358 | 0.164070 |
| 7  | 0.214098  | 1.893904  | -1.544262 | 1 | 2.571540  | 3.044996  | 2.707996 |
| 8  | 3.461958  | 0.810657  | -2.476175 | 1 | 1.576275  | 1.998183  | 3.764655 |
| 8  | -3.461958 | -0.810657 | -2.476175 | 1 | 3.655075  | 0.864613  | 3.040290 |
| 6  | 0.937264  | -3.613551 | 0.977734  | 1 | 3.182583  | 1.051176  | 1.317784 |
| 6  | 0.000000  | -3.347148 | 2.151014  | 1 | 3.532193  | -3.031951 | 1.288929 |
| 6  | 2.920826  | -2.122497 | 1.157000  | 1 | 3.474389  | -1.427468 | 0.520504 |
| 6  | 2.727075  | -1.472748 | 2.522266  | 1 | 3.711161  | -1.279689 | 2.965265 |
| 6  | 2.811797  | 0.945699  | 2.343624  | 1 | 2.176094  | -2.108432 | 3.216824 |
| 6  | 1.964224  | 2.131254  | 2.746298  | 1 | -2.176094 | 2.108432  | 3.216824 |
| 6  | -2.811797 | -0.945699 | 2.343624  | 1 | -3.711161 | 1.279689  | 2.965265 |
| 6  | -1.964224 | -2.131254 | 2.746298  | 1 | -3.474389 | 1.427468  | 0.520504 |
| 6  | -2.920826 | 2.122497  | 1.157000  | 1 | -3.532193 | 3.031951  | 1.288929 |
| 6  | -2.727075 | 1.472748  | 2.522266  |   |           |           |          |
| 6  | 0.000000  | 3.347148  | 2.151014  |   |           |           |          |
| 6  | -0.937264 | 3.613551  | 0.977734  |   |           |           |          |
| 6  | 2.005799  | -2.698693 | -0.986383 |   |           |           |          |
| 6  | -2.005799 | 2.698693  | -0.986383 |   |           |           |          |
| 6  | -0.777722 | 2.744544  | -1.867965 |   |           |           |          |
| 6  | 0.777722  | -2.744544 | -1.867965 |   |           |           |          |
| 6  | 1.340845  | 1.872591  | -2.283710 |   |           |           |          |
| 6  | 1.509521  | 2.680714  | -3.409103 |   |           |           |          |
| 6  | 0.477862  | 3.552795  | -3.758718 |   |           |           |          |
| 6  | -0.676756 | 3.597464  | -2.971678 |   |           |           |          |
| 6  | 0.676756  | -3.597464 | -2.971678 |   |           |           |          |
| 6  | -0.477862 | -3.552795 | -3.758718 |   |           |           |          |
| 6  | -1.509521 | -2.680714 | -3.409103 |   |           |           |          |
| 6  | -1.340845 | -1.872591 | -2.283710 |   |           |           |          |
| 1  | 2.574262  | -3.636523 | -1.085002 |   |           |           |          |
| 1  | 2.643686  | -1.872402 | -1.316140 |   |           |           |          |
| 1  | -2.574262 | 3.636523  | -1.085002 |   |           |           |          |
| 1  | -2.643686 | 1.872402  | -1.316140 |   |           |           |          |
| 1  | 2.436286  | 2.609898  | -3.966601 |   |           |           |          |
| 1  | 0.573276  | 4.201617  | -4.623857 |   |           |           |          |
| 1  | -1.486648 | 4.280337  | -3.207671 |   |           |           |          |
| 1  | 1.486648  | -4.280337 | -3.207671 |   |           |           |          |
| 1  | -0.573276 | -4.201617 | -4.623857 |   |           |           |          |
| 1  | -2.436286 | -2.609898 | -3.966601 |   |           |           |          |
| 6  | 2.433237  | 0.924382  | -1.814305 |   |           |           |          |
| 6  | -2.433237 | -0.924382 | -1.814305 |   |           |           |          |

| Ac(L) <sup>+</sup> Δ(λδδ)(λδδ) |           |           |                                 |
|--------------------------------|-----------|-----------|---------------------------------|
|                                |           |           | 1 -2.064236 -2.968107 -0.032701 |
|                                |           |           | 1 -2.498140 -3.812814 1.473323  |
|                                |           |           | 1 -0.253196 -4.047608 2.184244  |
|                                |           |           | 1 -0.380824 -4.727903 0.561276  |
|                                |           |           | 1 -1.441535 4.269375 -0.768652  |
|                                |           |           | 1 -2.109421 2.618964 -0.843977  |
|                                |           |           | 1 1.441535 -4.269375 -0.768652  |
|                                |           |           | 1 2.109421 -2.618964 -0.843977  |
|                                |           |           | 1 -2.423147 -1.504991 -4.217943 |
|                                |           |           | 1 -1.076248 -3.584288 -4.759776 |
|                                |           |           | 1 0.578320 -4.412147 -3.080032  |
|                                |           |           | 1 -0.578320 4.412147 -3.080032  |
|                                |           |           | 1 1.076248 3.584288 -4.759776   |
|                                |           |           | 1 2.423147 1.504991 -4.217943   |
|                                |           |           | 6 -2.273019 -0.055174 -1.884753 |
|                                |           |           | 6 2.273019 0.055174 -1.884753   |
|                                |           |           | 1 3.649649 -2.178460 2.440788   |
|                                |           |           | 1 3.211738 -1.590550 0.801340   |
|                                |           |           | 1 2.489883 -4.000233 1.366499   |
|                                |           |           | 1 1.493033 -3.307972 2.656444   |
|                                |           |           | 1 -3.649649 2.178460 2.440788   |
|                                |           |           | 1 -3.211738 1.590550 0.801340   |
|                                |           |           | 1 -1.493033 3.307972 2.656444   |
|                                |           |           | 1 -2.489883 4.000233 1.366499   |
| 89                             | 0.000000  | 0.000000  | 0.639363                        |
| 8                              | -2.072758 | 0.282971  | -0.637612                       |
| 8                              | 2.072758  | -0.282971 | -0.637612                       |
| 8                              | 1.734698  | 1.896834  | 1.720615                        |
| 8                              | -2.054741 | 0.844619  | 2.371590                        |
| 8                              | -1.734698 | -1.896834 | 1.720615                        |
| 8                              | 2.054741  | -0.844619 | 2.371590                        |
| 7                              | -0.751829 | 2.909596  | 0.729830                        |
| 7                              | 0.751829  | -2.909596 | 0.729830                        |
| 7                              | 0.531783  | 1.688307  | -1.441100                       |
| 7                              | -0.531783 | -1.688307 | -1.441100                       |
| 8                              | -3.031706 | 0.492985  | -2.681071                       |
| 8                              | 3.031706  | -0.492985 | -2.681071                       |
| 6                              | 0.386602  | 3.787349  | 1.131383                        |
| 6                              | 1.763181  | 3.146314  | 1.002570                        |
| 6                              | -1.897898 | 3.118615  | 1.659256                        |
| 6                              | -2.821961 | 1.919720  | 1.769140                        |
| 6                              | -2.855069 | -0.206260 | 2.947765                        |
| 6                              | -3.046839 | -1.359712 | 1.983171                        |
| 6                              | 2.855069  | 0.206260  | 2.947765                        |
| 6                              | 3.046839  | 1.359712  | 1.983171                        |
| 6                              | 1.897898  | -3.118615 | 1.659256                        |
| 6                              | 2.821961  | -1.919720 | 1.769140                        |
| 6                              | -1.763181 | -3.146314 | 1.002570                        |
| 6                              | -0.386602 | -3.787349 | 1.131383                        |
| 6                              | -1.199266 | 3.200186  | -0.660124                       |
| 6                              | 1.199266  | -3.200186 | -0.660124                       |
| 6                              | 0.181467  | -2.797681 | -1.703563                       |
| 6                              | -0.181467 | 2.797681  | -1.703563                       |
| 6                              | -1.457149 | -1.260964 | -2.323290                       |
| 6                              | -1.675969 | -1.904112 | -3.541758                       |
| 6                              | -0.929015 | -3.048695 | -3.827081                       |
| 6                              | 0.000000  | -3.513448 | -2.891521                       |
| 6                              | 0.000000  | 3.513448  | -2.891521                       |
| 6                              | 0.929015  | 3.048695  | -3.827081                       |
| 6                              | 1.675969  | 1.904112  | -3.541758                       |
| 6                              | 1.457149  | 1.260964  | -2.323290                       |
| 1                              | 0.253196  | 4.047608  | 2.184244                        |
| 1                              | 0.380824  | 4.727903  | 0.561276                        |
| 1                              | 2.498140  | 3.812814  | 1.473323                        |
| 1                              | 2.064236  | 2.968107  | -0.032701                       |
| 1                              | -3.825731 | 0.193755  | 3.261544                        |
| 1                              | -2.313471 | -0.551330 | 3.833208                        |
| 1                              | -3.506378 | -1.032114 | 1.043692                        |
| 1                              | -3.669783 | -2.132802 | 2.452600                        |
| 1                              | 3.825731  | -0.193755 | 3.261544                        |
| 1                              | 2.313471  | 0.551330  | 3.833208                        |
| 1                              | 3.669783  | 2.132802  | 2.452600                        |
| 1                              | 3.506378  | 1.032114  | 1.043692                        |

Ac(L)<sup>+</sup> Δ(λδλ)(λδλ)

|    |           |           |           |   |           |           |           |
|----|-----------|-----------|-----------|---|-----------|-----------|-----------|
|    |           |           |           | 1 | 2.147926  | -2.622988 | 3.601353  |
|    |           |           |           | 1 | 1.332979  | -1.092837 | 4.022578  |
| 89 | 0.000000  | 0.000000  | 0.340675  | 1 | 3.661848  | -0.686850 | 3.253223  |
| 8  | -1.061301 | 1.800758  | -0.899341 | 1 | 3.321659  | -1.547704 | 1.721138  |
| 8  | 1.061301  | -1.800758 | -0.899341 | 1 | 0.238913  | -3.702395 | 0.372570  |
| 8  | 2.341979  | 0.276238  | 1.964319  | 1 | -1.083343 | -4.557648 | 1.213034  |
| 8  | -0.754280 | 1.945948  | 2.210200  | 1 | -0.758061 | -2.985424 | 3.189855  |
| 8  | -2.341979 | -0.276238 | 1.964319  | 1 | 0.674579  | -3.945953 | 2.762382  |
| 8  | 0.754280  | -1.945948 | 2.210200  | 1 | -3.682086 | -0.706239 | 0.429639  |
| 7  | 1.512414  | 2.581054  | 0.490468  | 1 | -4.223702 | -1.156388 | 2.065321  |
| 7  | -1.512414 | -2.581054 | 0.490468  | 1 | -2.588765 | -2.890430 | 2.273192  |
| 7  | 1.960582  | 0.611533  | -1.497846 | 1 | -3.540075 | -3.184290 | 0.818414  |
| 7  | -1.960582 | -0.611533 | -1.497846 | 1 | 2.359895  | 3.880491  | -0.985882 |
| 8  | -2.276336 | 2.762538  | -2.553557 | 1 | 0.773475  | 3.161307  | -1.367191 |
| 8  | 2.276336  | -2.762538 | -2.553557 | 1 | -2.359895 | -3.880491 | -0.985882 |
| 6  | 2.780628  | 2.523198  | 1.261730  | 1 | -0.773475 | -3.161307 | -1.367191 |
| 6  | 3.359549  | 1.122620  | 1.388900  | 1 | -3.724694 | 1.091711  | -3.802295 |
| 6  | 0.585961  | 3.582685  | 1.078986  | 1 | -4.588466 | -1.250397 | -4.264506 |
| 6  | 0.000000  | 3.153976  | 2.413895  | 1 | -3.704241 | -3.141017 | -2.884997 |
| 6  | -1.757954 | 1.680424  | 3.198624  | 1 | 3.704241  | 3.141017  | -2.884997 |
| 6  | -2.884252 | 0.933858  | 2.518137  | 1 | 4.588466  | 1.250397  | -4.264506 |
| 6  | 1.757954  | -1.680424 | 3.198624  | 1 | 3.724694  | -1.091711 | -3.802295 |
| 6  | 2.884252  | -0.933858 | 2.518137  | 6 | -1.902860 | 1.794006  | -1.897109 |
| 6  | -0.585961 | -3.582685 | 1.078986  | 6 | 1.902860  | -1.794006 | -1.897109 |
| 6  | 0.000000  | -3.153976 | 2.413895  |   |           |           |           |
| 6  | -3.359549 | -1.122620 | 1.388900  |   |           |           |           |
| 6  | -2.780628 | -2.523198 | 1.261730  |   |           |           |           |
| 6  | 1.756006  | 2.961592  | -0.925624 |   |           |           |           |
| 6  | -1.756006 | -2.961592 | -0.925624 |   |           |           |           |
| 6  | -2.404652 | -1.861843 | -1.733402 |   |           |           |           |
| 6  | 2.404652  | 1.861843  | -1.733402 |   |           |           |           |
| 6  | -2.442974 | 0.411554  | -2.232211 |   |           |           |           |
| 6  | -3.385557 | 0.225976  | -3.245290 |   |           |           |           |
| 6  | -3.850750 | -1.065937 | -3.489667 |   |           |           |           |
| 6  | -3.359531 | -2.125162 | -2.720164 |   |           |           |           |
| 6  | 3.359531  | 2.125162  | -2.720164 |   |           |           |           |
| 6  | 3.850750  | 1.065937  | -3.489667 |   |           |           |           |
| 6  | 3.385557  | -0.225976 | -3.245290 |   |           |           |           |
| 6  | 2.442974  | -0.411554 | -2.232211 |   |           |           |           |
| 1  | 2.588765  | 2.890430  | 2.273192  |   |           |           |           |
| 1  | 3.540075  | 3.184290  | 0.818414  |   |           |           |           |
| 1  | 4.223702  | 1.156388  | 2.065321  |   |           |           |           |
| 1  | 3.682086  | 0.706239  | 0.429639  |   |           |           |           |
| 1  | -0.238913 | 3.702395  | 0.372570  |   |           |           |           |
| 1  | 1.083343  | 4.557648  | 1.213034  |   |           |           |           |
| 1  | -0.674579 | 3.945953  | 2.762382  |   |           |           |           |
| 1  | 0.758061  | 2.985424  | 3.189855  |   |           |           |           |
| 1  | -2.147926 | 2.622988  | 3.601353  |   |           |           |           |
| 1  | -1.332979 | 1.092837  | 4.022578  |   |           |           |           |
| 1  | -3.321659 | 1.547704  | 1.721138  |   |           |           |           |
| 1  | -3.661848 | 0.686850  | 3.253223  |   |           |           |           |

Ac(L)+  $\Delta(\lambda\lambda\delta)(\lambda\lambda\delta)$

|    |           |           |           |   |           |           |           |
|----|-----------|-----------|-----------|---|-----------|-----------|-----------|
|    |           |           |           | 1 | 1.456331  | 4.236848  | -2.465485 |
|    |           |           |           | 1 | 3.542424  | 4.785107  | -1.135277 |
|    |           |           |           | 1 | 4.417954  | 3.093422  | 0.481383  |
|    |           |           |           | 1 | -4.108534 | 3.493524  | -0.481463 |
|    |           |           |           | 1 | -3.078418 | 5.095633  | 1.135336  |
|    |           |           |           | 1 | -1.053013 | 4.354178  | 2.465708  |
|    |           |           |           | 6 | 0.024836  | 1.877949  | -2.310337 |
|    |           |           |           | 6 | 0.151176  | 1.871484  | 2.310395  |
|    |           |           |           | 1 | 2.413341  | -2.556926 | 3.413833  |
|    |           |           |           | 1 | 1.937950  | -0.850054 | 3.146635  |
|    |           |           |           | 1 | 4.124564  | -1.650853 | 2.001928  |
|    |           |           |           | 1 | 3.106579  | -2.741250 | 1.041205  |
|    |           |           |           | 1 | -2.642577 | -2.320003 | -3.413589 |
|    |           |           |           | 1 | -2.008958 | -0.665314 | -3.146247 |
|    |           |           |           | 1 | -3.349934 | -2.438421 | -1.040762 |
|    |           |           |           | 1 | -4.261097 | -1.257400 | -2.001623 |
|    |           |           |           | 1 | 0.249442  | -1.520633 | -3.576606 |
|    |           |           |           | 1 | -0.494114 | -3.122055 | -3.857984 |
|    |           |           |           | 1 | 1.843400  | -3.472006 | -3.140455 |
|    |           |           |           | 1 | 0.721491  | -4.049055 | -1.882587 |
|    |           |           |           | 1 | -0.391237 | -1.490107 | 3.576780  |
|    |           |           |           | 1 | 0.199531  | -3.154011 | 3.858056  |
|    |           |           |           | 1 | -1.097121 | -3.963406 | 1.882647  |
|    |           |           |           | 1 | -2.160378 | -3.284268 | 3.140477  |
| 89 | -0.028101 | -0.598677 | -0.000142 |   |           |           |           |
| 8  | -0.295768 | 0.625069  | -2.108684 |   |           |           |           |
| 8  | 0.352625  | 0.594017  | 2.108799  |   |           |           |           |
| 8  | -1.912462 | -2.173329 | 1.392991  |   |           |           |           |
| 8  | -1.049073 | -2.171899 | -2.090640 |   |           |           |           |
| 8  | 1.700241  | -2.342721 | -1.393041 |   |           |           |           |
| 8  | 0.840834  | -2.259671 | 2.090808  |   |           |           |           |
| 7  | -2.923843 | -0.454575 | -0.532777 |   |           |           |           |
| 7  | 2.868546  | -0.726290 | 0.532879  |   |           |           |           |
| 7  | -1.561639 | 1.587187  | 0.620882  |   |           |           |           |
| 7  | 1.703596  | 1.434190  | -0.620954 |   |           |           |           |
| 8  | -0.560763 | 2.675812  | -3.038929 |   |           |           |           |
| 8  | 0.808959  | 2.610804  | 3.039150  |   |           |           |           |
| 6  | -3.696271 | -0.709964 | 0.722169  |   |           |           |           |
| 6  | -2.803263 | -1.143220 | 1.881709  |   |           |           |           |
| 6  | -3.278112 | -1.475563 | -1.553165 |   |           |           |           |
| 6  | -2.254874 | -1.617305 | -2.664503 |   |           |           |           |
| 6  | -0.062941 | -2.456983 | -3.097147 |   |           |           |           |
| 6  | 1.088366  | -3.163488 | -2.407537 |   |           |           |           |
| 6  | -0.167643 | -2.451506 | 3.097285  |   |           |           |           |
| 6  | -1.379821 | -3.047495 | 2.407604  |   |           |           |           |
| 6  | 3.125440  | -1.775840 | 1.553491  |   |           |           |           |
| 6  | 2.093362  | -1.820868 | 2.664780  |   |           |           |           |
| 6  | 2.683776  | -1.400712 | -1.881605 |   |           |           |           |
| 6  | 3.613525  | -1.053294 | -0.722032 |   |           |           |           |
| 6  | -3.181450 | 0.916872  | -1.044798 |   |           |           |           |
| 6  | 3.253529  | 0.615030  | 1.044697  |   |           |           |           |
| 6  | 2.819179  | 1.698518  | 0.080985  |   |           |           |           |
| 6  | -2.647498 | 1.954934  | -0.081092 |   |           |           |           |
| 6  | 1.248089  | 2.323947  | -1.524725 |   |           |           |           |
| 6  | 1.872392  | 3.553193  | -1.734515 |   |           |           |           |
| 6  | 3.022348  | 3.842452  | -0.995840 |   |           |           |           |
| 6  | 3.514329  | 2.900325  | -0.087617 |   |           |           |           |
| 6  | -3.226996 | 3.216583  | 0.087551  |   |           |           |           |
| 6  | -2.648965 | 4.108391  | 0.995884  |   |           |           |           |
| 6  | -1.531241 | 3.712580  | 1.734640  |   |           |           |           |
| 6  | -1.024854 | 2.430269  | 1.524795  |   |           |           |           |
| 1  | -4.453040 | -1.479590 | 0.535938  |   |           |           |           |
| 1  | -4.227557 | 0.197412  | 1.027991  |   |           |           |           |
| 1  | -3.417916 | -1.547581 | 2.695281  |   |           |           |           |
| 1  | -2.214417 | -0.301763 | 2.266856  |   |           |           |           |
| 1  | 2.176549  | -0.507657 | -2.266669 |   |           |           |           |
| 1  | 3.257776  | -1.860855 | -2.695236 |   |           |           |           |
| 1  | 4.294383  | -1.890794 | -0.535699 |   |           |           |           |
| 1  | 4.228010  | -0.200048 | -1.027862 |   |           |           |           |
| 1  | -4.256833 | 1.079409  | -1.218806 |   |           |           |           |
| 1  | -2.656468 | 1.030856  | -1.999176 |   |           |           |           |
| 1  | 4.339405  | 0.676144  | 1.218728  |   |           |           |           |
| 1  | 2.741588  | 0.777807  | 1.999081  |   |           |           |           |

Ac(L)<sup>+</sup> Δ(λλλ)(λλλ)

|    |           |           |           |   |           |           |           |
|----|-----------|-----------|-----------|---|-----------|-----------|-----------|
|    |           |           |           | 1 | -2.828016 | -2.364405 | -3.840056 |
|    |           |           |           | 1 | -1.341629 | -4.368699 | -4.304764 |
| 89 | 0.000000  | 0.000000  | 0.462614  | 1 | 0.652896  | -4.739306 | -2.841635 |
| 8  | -2.089078 | 0.131704  | -0.797914 | 1 | -0.652896 | 4.739306  | -2.841635 |
| 8  | 2.089078  | -0.131704 | -0.797914 | 1 | 1.341629  | 4.368699  | -4.304764 |
| 8  | 1.339187  | 2.136666  | 1.612926  | 1 | 2.828016  | 2.364405  | -3.840056 |
| 8  | -2.058918 | 0.347244  | 2.394777  | 6 | -2.491961 | -0.533232 | -1.848392 |
| 8  | -1.339187 | -2.136666 | 1.612926  | 6 | 2.491961  | 0.533232  | -1.848392 |
| 8  | 2.058918  | -0.347244 | 2.394777  | 1 | -3.404712 | -0.451251 | 1.019861  |
| 7  | 1.281543  | -2.668927 | 0.617273  | 1 | -3.975531 | -0.405948 | 2.722884  |
| 7  | 0.520779  | 1.911260  | -1.432987 | 1 | -3.325538 | -2.701521 | 1.931342  |
| 7  | -0.520779 | -1.911260 | -1.432987 | 1 | -2.421912 | -2.167037 | 3.379026  |
| 7  | -1.281543 | 2.668927  | 0.617273  | 1 | 3.404712  | 0.451251  | 1.019861  |
| 8  | -3.484508 | -0.292539 | -2.531026 | 1 | 3.975531  | 0.405948  | 2.722884  |
| 8  | 3.484508  | 0.292539  | -2.531026 | 1 | 2.421912  | 2.167037  | 3.379026  |
| 6  | -0.494828 | 3.678824  | 1.368712  | 1 | 3.325538  | 2.701521  | 1.931342  |
| 6  | 1.015253  | 3.500644  | 1.275741  | 1 | 1.807655  | -2.151372 | 3.277758  |
| 6  | -2.607968 | 2.474853  | 1.264859  | 1 | 3.500350  | -1.690216 | 3.062996  |
| 6  | -2.517019 | 1.702810  | 2.577530  | 1 | 3.102296  | -3.442164 | 1.455845  |
| 6  | -3.113649 | -0.582960 | 2.067125  | 1 | 3.226142  | -1.911751 | 0.560984  |
| 6  | -2.589874 | -1.982915 | 2.311159  | 1 | -3.500350 | 1.690216  | 3.062996  |
| 6  | 3.113649  | 0.582960  | 2.067125  | 1 | -1.807655 | 2.151372  | 3.277758  |
| 6  | 2.589874  | 1.982915  | 2.311159  | 1 | -3.102296 | 3.442164  | 1.455845  |
| 6  | 2.607968  | -2.474853 | 1.264859  | 1 | -3.226142 | 1.911751  | 0.560984  |
| 6  | 2.517019  | -1.702810 | 2.577530  |   |           |           |           |
| 6  | -1.015253 | -3.500644 | 1.275741  |   |           |           |           |
| 6  | 0.494828  | -3.678824 | 1.368712  |   |           |           |           |
| 6  | -1.506821 | 3.089125  | -0.791796 |   |           |           |           |
| 6  | 1.506821  | -3.089125 | -0.791796 |   |           |           |           |
| 6  | 0.273426  | -2.974936 | -1.659089 |   |           |           |           |
| 6  | -0.273426 | 2.974936  | -1.659089 |   |           |           |           |
| 6  | -1.612340 | -1.723089 | -2.201793 |   |           |           |           |
| 6  | -1.941216 | -2.578624 | -3.254860 |   |           |           |           |
| 6  | -1.116562 | -3.677156 | -3.498727 |   |           |           |           |
| 6  | 0.000000  | -3.886707 | -2.684134 |   |           |           |           |
| 6  | 0.000000  | 3.886707  | -2.684134 |   |           |           |           |
| 6  | 1.116562  | 3.677156  | -3.498727 |   |           |           |           |
| 6  | 1.941216  | 2.578624  | -3.254860 |   |           |           |           |
| 6  | 1.612340  | 1.723089  | -2.201793 |   |           |           |           |
| 1  | -0.764757 | 3.600851  | 2.424433  |   |           |           |           |
| 1  | -0.754334 | 4.698976  | 1.043688  |   |           |           |           |
| 1  | 1.484563  | 4.177942  | 1.999076  |   |           |           |           |
| 1  | 1.411992  | 3.722950  | 0.280907  |   |           |           |           |
| 1  | -1.411992 | -3.722950 | 0.280907  |   |           |           |           |
| 1  | -1.484563 | -4.177942 | 1.999076  |   |           |           |           |
| 1  | 0.764757  | -3.600851 | 2.424433  |   |           |           |           |
| 1  | 0.754334  | -4.698976 | 1.043688  |   |           |           |           |
| 1  | -1.902937 | 4.115689  | -0.834341 |   |           |           |           |
| 1  | -2.259875 | 2.408018  | -1.202432 |   |           |           |           |
| 1  | 1.902937  | -4.115689 | -0.834341 |   |           |           |           |
| 1  | 2.259875  | -2.408018 | -1.202432 |   |           |           |           |

**cf(L)\*  $\Delta(\delta\lambda\delta)(\delta\lambda\delta)$**

|    |           |           |           |   |           |           |           |
|----|-----------|-----------|-----------|---|-----------|-----------|-----------|
|    |           |           |           | 1 | 4.684787  | -0.368839 | 0.834339  |
|    |           |           |           | 1 | 3.612487  | -2.181813 | 2.152882  |
|    |           |           |           | 1 | 3.367584  | -0.607642 | 2.934636  |
|    |           |           |           | 1 | -4.684787 | 0.368839  | 0.834339  |
|    |           |           |           | 1 | -3.435661 | 1.251603  | -0.062914 |
|    |           |           |           | 1 | -3.612487 | 2.181813  | 2.152882  |
|    |           |           |           | 1 | -3.367584 | 0.607642  | 2.934636  |
|    |           |           |           | 1 | -1.775166 | -3.228662 | 0.774183  |
|    |           |           |           | 1 | -2.436679 | -3.464334 | 2.425735  |
|    |           |           |           | 1 | -3.506342 | -1.285177 | 2.375445  |
|    |           |           |           | 1 | -4.120940 | -2.297884 | 1.069120  |
|    |           |           |           | 1 | 2.436679  | 3.464334  | 2.425735  |
|    |           |           |           | 1 | 1.775166  | 3.228662  | 0.774183  |
|    |           |           |           | 1 | 4.120940  | 2.297884  | 1.069120  |
|    |           |           |           | 1 | 3.506342  | 1.285177  | 2.375445  |
|    |           |           |           | 1 | 0.956276  | -1.380945 | 3.916845  |
|    |           |           |           | 1 | 1.970993  | -2.785193 | 3.494786  |
|    |           |           |           | 1 | 0.276383  | -3.571756 | 1.875185  |
|    |           |           |           | 1 | -0.387601 | -3.473934 | 3.535159  |
|    |           |           |           | 1 | 3.435661  | -1.251603 | -0.062914 |
|    |           |           |           | 1 | -1.970993 | 2.785193  | 3.494786  |
|    |           |           |           | 1 | -0.956276 | 1.380945  | 3.916845  |
|    |           |           |           | 1 | 0.387601  | 3.473934  | 3.535159  |
|    |           |           |           | 1 | -0.276383 | 3.571756  | 1.875185  |
| 98 | 0.000000  | 0.000000  | 0.463144  |   |           |           |           |
| 8  | 0.345382  | 2.005564  | -0.496484 |   |           |           |           |
| 8  | -0.345382 | -2.005564 | -0.496484 |   |           |           |           |
| 8  | 1.703549  | -1.390240 | 1.972417  |   |           |           |           |
| 8  | 0.999989  | 1.975892  | 2.229325  |   |           |           |           |
| 8  | -1.703549 | 1.390240  | 1.972417  |   |           |           |           |
| 8  | -0.999989 | -1.975892 | 2.229325  |   |           |           |           |
| 7  | 2.848743  | 0.686178  | 0.468392  |   |           |           |           |
| 7  | -2.848743 | -0.686178 | 0.468392  |   |           |           |           |
| 7  | 1.513403  | -0.553770 | -1.533438 |   |           |           |           |
| 7  | -1.513403 | 0.553770  | -1.533438 |   |           |           |           |
| 8  | 0.717939  | 3.144755  | -2.414641 |   |           |           |           |
| 8  | -0.717939 | -3.144755 | -2.414641 |   |           |           |           |
| 6  | 3.599867  | -0.552750 | 0.759936  |   |           |           |           |
| 6  | 3.126570  | -1.203480 | 2.045004  |   |           |           |           |
| 6  | 3.235259  | 1.749465  | 1.424917  |   |           |           |           |
| 6  | 2.109216  | 2.722489  | 1.684865  |   |           |           |           |
| 6  | 0.000000  | 2.889302  | 2.688878  |   |           |           |           |
| 6  | -1.203451 | 2.096660  | 3.122523  |   |           |           |           |
| 6  | 0.000000  | -2.889302 | 2.688878  |   |           |           |           |
| 6  | 1.203451  | -2.096660 | 3.122523  |   |           |           |           |
| 6  | -3.235259 | -1.749465 | 1.424917  |   |           |           |           |
| 6  | -2.109216 | -2.722489 | 1.684865  |   |           |           |           |
| 6  | -3.126570 | 1.203480  | 2.045004  |   |           |           |           |
| 6  | -3.599867 | 0.552750  | 0.759936  |   |           |           |           |
| 6  | 3.125480  | 1.141174  | -0.914541 |   |           |           |           |
| 6  | -3.125480 | -1.141174 | -0.914541 |   |           |           |           |
| 6  | -2.589117 | -0.153694 | -1.922134 |   |           |           |           |
| 6  | 2.589117  | 0.153694  | -1.922134 |   |           |           |           |
| 6  | -1.028361 | 1.517270  | -2.341925 |   |           |           |           |
| 6  | -1.551153 | 1.771935  | -3.607029 |   |           |           |           |
| 6  | -2.641755 | 1.010680  | -4.032306 |   |           |           |           |
| 6  | -3.181270 | 0.051341  | -3.172811 |   |           |           |           |
| 6  | 3.181270  | -0.051341 | -3.172811 |   |           |           |           |
| 6  | 2.641755  | -1.010680 | -4.032306 |   |           |           |           |
| 6  | 1.551153  | -1.771935 | -3.607029 |   |           |           |           |
| 6  | 1.028361  | -1.517270 | -2.341925 |   |           |           |           |
| 1  | 4.207026  | 1.281203  | -1.074791 |   |           |           |           |
| 1  | 2.630834  | 2.107177  | -1.062182 |   |           |           |           |
| 1  | -4.207026 | -1.281203 | -1.074791 |   |           |           |           |
| 1  | -2.630834 | -2.107177 | -1.062182 |   |           |           |           |
| 1  | -1.106269 | 2.555118  | -4.209988 |   |           |           |           |
| 1  | -3.084052 | 1.177153  | -5.009539 |   |           |           |           |
| 1  | -4.051941 | -0.528790 | -3.460638 |   |           |           |           |
| 1  | 4.051941  | 0.528790  | -3.460638 |   |           |           |           |
| 1  | 3.084052  | -1.177153 | -5.009539 |   |           |           |           |
| 1  | 1.106269  | -2.555118 | -4.209988 |   |           |           |           |
| 6  | 0.108231  | 2.314352  | -1.747366 |   |           |           |           |
| 6  | -0.108231 | -2.314352 | -1.747366 |   |           |           |           |

**cf(L)\*  $\Delta(\delta\lambda\lambda)(\delta\lambda\lambda)$**

|    |           |           |           |   |           |           |           |
|----|-----------|-----------|-----------|---|-----------|-----------|-----------|
|    |           |           |           | 1 | -0.864133 | 4.689769  | 0.228412  |
|    |           |           |           | 1 | -1.795747 | 3.675531  | 2.360323  |
|    |           |           |           | 1 | -2.829747 | 3.421917  | 0.949357  |
|    |           |           |           | 1 | -0.864164 | -4.689758 | -0.228426 |
|    |           |           |           | 1 | 0.206061  | -3.633733 | -1.160402 |
|    |           |           |           | 1 | -1.795786 | -3.675503 | -2.360328 |
|    |           |           |           | 1 | -2.829781 | -3.421904 | -0.949355 |
|    |           |           |           | 1 | -3.748716 | 1.403364  | 2.007383  |
|    |           |           |           | 1 | -2.728727 | 1.859075  | 3.403969  |
|    |           |           |           | 1 | -1.516269 | -0.291012 | 3.272387  |
|    |           |           |           | 1 | -3.289689 | -0.571503 | 3.388708  |
|    |           |           |           | 1 | 0.206095  | 3.633748  | 1.160387  |
|    |           |           |           | 1 | -2.728762 | -1.859051 | -3.403958 |
|    |           |           |           | 1 | -3.748749 | -1.403319 | -2.007377 |
|    |           |           |           | 1 | -3.289688 | 0.571537  | -3.388709 |
|    |           |           |           | 1 | -1.516273 | 0.291017  | -3.272384 |
|    |           |           |           | 1 | -1.501079 | 4.089742  | -1.941439 |
|    |           |           |           | 1 | -0.805297 | 2.627855  | -2.674503 |
|    |           |           |           | 1 | -3.272829 | 2.497832  | -2.490094 |
|    |           |           |           | 1 | -3.178733 | 2.589768  | -0.730988 |
|    |           |           |           | 1 | -3.178755 | -2.589730 | 0.730981  |
|    |           |           |           | 1 | -3.272850 | -2.497800 | 2.490087  |
|    |           |           |           | 1 | -0.805319 | -2.627853 | 2.674496  |
|    |           |           |           | 1 | -1.501118 | -4.089728 | 1.941426  |
| 98 | -0.445934 | -0.000002 | 0.000004  |   |           |           |           |
| 8  | 0.418231  | 0.423336  | -2.052956 |   |           |           |           |
| 8  | 0.418228  | -0.423344 | 2.052945  |   |           |           |           |
| 8  | -1.750166 | 1.758961  | 1.569975  |   |           |           |           |
| 8  | -2.454991 | 0.861776  | -1.502414 |   |           |           |           |
| 8  | -1.750205 | -1.758941 | -1.569962 |   |           |           |           |
| 8  | -2.454996 | -0.861749 | 1.502413  |   |           |           |           |
| 7  | -0.389113 | 2.791307  | -0.645139 |   |           |           |           |
| 7  | -0.389135 | -2.791302 | 0.645131  |   |           |           |           |
| 7  | 1.541323  | 1.451922  | 0.643053  |   |           |           |           |
| 7  | 1.541316  | -1.451936 | -0.643058 |   |           |           |           |
| 8  | 2.289308  | 0.788366  | -3.270264 |   |           |           |           |
| 8  | 2.289296  | -0.788382 | 3.270263  |   |           |           |           |
| 6  | -0.685218 | 3.644557  | 0.529622  |   |           |           |           |
| 6  | -1.852324 | 3.175310  | 1.384048  |   |           |           |           |
| 6  | -1.305284 | 3.015630  | -1.783676 |   |           |           |           |
| 6  | -2.634437 | 2.286268  | -1.624075 |   |           |           |           |
| 6  | -2.479687 | 0.170003  | -2.767777 |   |           |           |           |
| 6  | -2.760263 | -1.281771 | -2.470542 |   |           |           |           |
| 6  | -2.479680 | -0.169980 | 2.767779  |   |           |           |           |
| 6  | -2.760233 | 1.281800  | 2.470551  |   |           |           |           |
| 6  | -1.305311 | -3.015618 | 1.783667  |   |           |           |           |
| 6  | -2.634456 | -2.286239 | 1.624069  |   |           |           |           |
| 6  | -1.852360 | -3.175292 | -1.384048 |   |           |           |           |
| 6  | -0.685249 | -3.644545 | -0.529632 |   |           |           |           |
| 6  | 1.007696  | 3.077790  | -1.066205 |   |           |           |           |
| 6  | 1.007671  | -3.077802 | 1.066196  |   |           |           |           |
| 6  | 1.973535  | -2.526222 | 0.042023  |   |           |           |           |
| 6  | 1.973552  | 2.526204  | -0.042028 |   |           |           |           |
| 6  | 2.293737  | -0.954481 | -1.643801 |   |           |           |           |
| 6  | 3.551804  | -1.462460 | -1.959581 |   |           |           |           |
| 6  | 4.026977  | -2.547497 | -1.220135 |   |           |           |           |
| 6  | 3.221453  | -3.100498 | -0.221693 |   |           |           |           |
| 6  | 3.221473  | 3.100472  | 0.221689  |   |           |           |           |
| 6  | 4.026991  | 2.547470  | 1.220136  |   |           |           |           |
| 6  | 3.551809  | 1.462438  | 1.959581  |   |           |           |           |
| 6  | 2.293741  | 0.954465  | 1.643798  |   |           |           |           |
| 1  | 1.175658  | 4.159538  | -1.187452 |   |           |           |           |
| 1  | 1.182648  | 2.598370  | -2.034054 |   |           |           |           |
| 1  | 1.175620  | -4.159553 | 1.187438  |   |           |           |           |
| 1  | 1.182628  | -2.598389 | 2.034048  |   |           |           |           |
| 1  | 4.110785  | -1.010606 | -2.770869 |   |           |           |           |
| 1  | 5.000633  | -2.977001 | -1.434450 |   |           |           |           |
| 1  | 3.547665  | -3.969170 | 0.341022  |   |           |           |           |
| 1  | 3.547691  | 3.969140  | -0.341027 |   |           |           |           |
| 1  | 5.000649  | 2.976969  | 1.434452  |   |           |           |           |
| 1  | 4.110784  | 1.010582  | 2.770872  |   |           |           |           |
| 6  | 1.654406  | 0.179376  | -2.413450 |   |           |           |           |
| 6  | 1.654404  | -0.179389 | 2.413445  |   |           |           |           |



**cf(L)\*  $\Delta(\lambda\delta\delta)(\lambda\delta\delta)$**

|    |           |           |           |   |           |           |           |
|----|-----------|-----------|-----------|---|-----------|-----------|-----------|
|    |           |           |           | 1 | 0.063216  | -2.401395 | -2.346224 |
|    |           |           |           | 1 | -1.352501 | -3.392744 | -2.777118 |
|    |           |           |           | 1 | -1.607459 | -4.308232 | -0.635936 |
|    |           |           |           | 1 | 0.131053  | -4.351681 | -0.897123 |
|    |           |           |           | 1 | 0.985688  | 4.196090  | -1.259287 |
|    |           |           |           | 1 | 0.863657  | 2.612660  | -2.063788 |
|    |           |           |           | 1 | 0.985990  | -4.196025 | 1.259215  |
|    |           |           |           | 1 | 0.863883  | -2.612621 | 2.063755  |
|    |           |           |           | 1 | 4.205851  | -1.010107 | -2.453646 |
|    |           |           |           | 1 | 4.987346  | -2.994361 | -1.078251 |
|    |           |           |           | 1 | 3.401183  | -4.013119 | 0.561305  |
|    |           |           |           | 1 | 3.400838  | 4.013371  | -0.561360 |
|    |           |           |           | 1 | 4.987102  | 2.994740  | 1.078181  |
|    |           |           |           | 1 | 4.205773  | 1.010418  | 2.453576  |
|    |           |           |           | 6 | 1.704154  | 0.159828  | -2.281566 |
|    |           |           |           | 6 | 1.704190  | -0.159716 | 2.281520  |
|    |           |           |           | 1 | -2.760603 | -2.343585 | 3.071856  |
|    |           |           |           | 1 | -1.089970 | -1.690184 | 2.967440  |
|    |           |           |           | 1 | -1.336434 | -4.087363 | 2.112892  |
|    |           |           |           | 1 | -2.508939 | -3.471931 | 0.934256  |
|    |           |           |           | 1 | -2.760823 | 2.343316  | -3.071861 |
|    |           |           |           | 1 | -1.090151 | 1.690018  | -2.967415 |
|    |           |           |           | 1 | -2.509196 | 3.471865  | -0.934374 |
|    |           |           |           | 1 | -1.336696 | 4.087235  | -2.113044 |
| 98 | -0.551062 | -0.000049 | 0.000008  |   |           |           |           |
| 8  | 0.433316  | 0.358622  | -2.019473 |   |           |           |           |
| 8  | 0.433367  | -0.358631 | 2.019439  |   |           |           |           |
| 8  | -1.749531 | 1.707982  | 1.626929  |   |           |           |           |
| 8  | -2.432836 | 0.985003  | -1.530762 |   |           |           |           |
| 8  | -1.749598 | -1.708080 | -1.626845 |   |           |           |           |
| 8  | -2.432717 | -0.985135 | 1.530860  |   |           |           |           |
| 7  | -0.541201 | 2.888514  | -0.516665 |   |           |           |           |
| 7  | -0.540956 | -2.888502 | 0.516613  |   |           |           |           |
| 7  | 1.485273  | 1.470562  | 0.526888  |   |           |           |           |
| 7  | 1.485414  | -1.470458 | -0.526926 |   |           |           |           |
| 8  | 2.381406  | 0.782283  | -3.093426 |   |           |           |           |
| 8  | 2.381503  | -0.782108 | 3.093376  |   |           |           |           |
| 6  | -0.719906 | 3.678218  | 0.738116  |   |           |           |           |
| 6  | -0.884915 | 2.803223  | 1.978366  |   |           |           |           |
| 6  | -1.606774 | 3.216992  | -1.494427 |   |           |           |           |
| 6  | -1.949604 | 2.049134  | -2.395258 |   |           |           |           |
| 6  | -3.237927 | 0.007238  | -2.215908 |   |           |           |           |
| 6  | -2.369057 | -1.099763 | -2.770608 |   |           |           |           |
| 6  | -3.237738 | -0.007396 | 2.216132  |   |           |           |           |
| 6  | -2.368826 | 1.099613  | 2.770751  |   |           |           |           |
| 6  | -1.606531 | -3.217079 | 1.494342  |   |           |           |           |
| 6  | -1.949410 | -2.049305 | 2.395265  |   |           |           |           |
| 6  | -0.884847 | -2.803184 | -1.978390 |   |           |           |           |
| 6  | -0.719599 | -3.678200 | -0.738187 |   |           |           |           |
| 6  | 0.803508  | 3.121844  | -1.096712 |   |           |           |           |
| 6  | 0.803764  | -3.121784 | 1.096666  |   |           |           |           |
| 6  | 1.857133  | -2.558812 | 0.169499  |   |           |           |           |
| 6  | 1.856907  | 2.558946  | -0.169538 |   |           |           |           |
| 6  | 2.308912  | -0.961111 | -1.463547 |   |           |           |           |
| 6  | 3.586062  | -1.467879 | -1.691214 |   |           |           |           |
| 6  | 4.000805  | -2.565463 | -0.932688 |   |           |           |           |
| 6  | 3.120058  | -3.133786 | -0.008954 |   |           |           |           |
| 6  | 3.119790  | 3.134017  | 0.008904  |   |           |           |           |
| 6  | 4.000593  | 2.565765  | 0.932627  |   |           |           |           |
| 6  | 3.585943  | 1.468146  | 1.691152  |   |           |           |           |
| 6  | 2.308831  | 0.961278  | 1.463495  |   |           |           |           |
| 1  | -1.607902 | 4.308064  | 0.635904  |   |           |           |           |
| 1  | 0.130620  | 4.351881  | 0.896972  |   |           |           |           |
| 1  | -1.352598 | 3.392748  | 2.777105  |   |           |           |           |
| 1  | 0.063236  | 2.401597  | 2.346149  |   |           |           |           |
| 1  | -3.819362 | 0.490674  | -3.008602 |   |           |           |           |
| 1  | -3.924344 | -0.400125 | -1.468707 |   |           |           |           |
| 1  | -1.599952 | -0.710601 | -3.448700 |   |           |           |           |
| 1  | -2.981911 | -1.842703 | -3.298174 |   |           |           |           |
| 1  | -3.819062 | -0.490865 | 3.008887  |   |           |           |           |
| 1  | -3.924258 | 0.399969  | 1.469027  |   |           |           |           |
| 1  | -2.981645 | 1.842517  | 3.298412  |   |           |           |           |
| 1  | -1.599626 | 0.710459  | 3.448739  |   |           |           |           |

**cf(L)\*  $\Delta(\lambda\delta\lambda)(\lambda\delta\lambda)$**

98 0.459880 0.000000 0.000000  
 8 -0.417952 -0.308377 -2.077705  
 8 -0.417950 0.308375 2.077706  
 8 1.788606 -1.781125 1.412459  
 8 2.449755 -0.837002 -1.420797  
 8 1.788607 1.781118 -1.412463  
 8 2.449757 0.836997 1.420799  
 7 0.423072 -2.784423 -0.770128  
 7 0.423080 2.784420 0.770128  
 7 -1.528453 -1.507754 0.588439  
 7 -1.528448 1.507756 -0.588438  
 8 -2.336238 -0.712535 -3.211425  
 8 -2.336237 0.712547 3.211419  
 6 0.867098 -3.689424 0.325694  
 6 1.022175 -2.974536 1.661574  
 6 1.314785 -2.892524 -1.945808  
 6 2.661329 -2.239760 -1.681204  
 6 3.255521 0.087370 -2.167622  
 6 2.363077 1.225877 -2.607462  
 6 3.255523 -0.087379 2.167619  
 6 2.363079 -1.225885 2.607458  
 6 1.314793 2.892521 1.945809  
 6 2.661336 2.239754 1.681209  
 6 1.022182 2.974533 -1.661575  
 6 0.867109 3.689420 -0.325694  
 6 -0.974555 -3.069941 -1.169656  
 6 -0.974545 3.069942 1.169657  
 6 -1.934471 2.582461 0.110563  
 6 -1.934478 -2.582458 -0.110561  
 6 -2.295365 1.038213 -1.593092  
 6 -3.542369 1.577780 -1.898918  
 6 -3.985522 2.672346 -1.152872  
 6 -3.165285 3.194597 -0.150247  
 6 -3.165293 -3.194592 0.150251  
 6 -3.985528 -2.672339 1.152876  
 6 -3.542373 -1.577771 1.898920  
 6 -2.295368 -1.038208 1.593093  
 1 1.834217 -4.124741 0.055664  
 1 0.166269 -4.525339 0.447446  
 1 1.572073 -3.618559 2.359925  
 1 0.063420 -2.701373 2.111729  
 1 0.829125 -2.361855 -2.767558  
 1 1.473715 -3.942397 -2.243356  
 1 3.301115 -2.356374 -2.562183  
 1 3.177430 -2.673904 -0.818264  
 1 3.679843 -0.405025 -3.049131  
 1 4.072592 0.451692 -1.534038  
 1 1.564768 0.863378 -3.264650  
 1 2.956601 1.992811 -3.122283

1 3.679849 0.405012 3.049128  
 1 4.072592 -0.451701 1.534031  
 1 2.956602 -1.992821 3.122277  
 1 1.564771 -0.863387 3.264648  
 1 0.829131 2.361853 2.767559  
 1 1.473724 3.942394 2.243356  
 1 3.177442 2.673898 0.818272  
 1 3.301118 2.356364 2.562191  
 1 0.063426 2.701377 -2.111732  
 1 1.572084 3.618555 -2.359925  
 1 1.834229 4.124733 -0.055665  
 1 0.166282 4.525338 -0.447444  
 1 -1.129847 -4.145519 -1.347804  
 1 -1.179270 -2.540135 -2.106474  
 1 -1.129835 4.145520 1.347804  
 1 -1.179262 2.540137 2.106476  
 1 -4.116594 1.145051 -2.710020  
 1 -4.947083 3.130097 -1.363424  
 1 -3.469191 4.065094 0.422050  
 1 -3.469202 -4.065089 -0.422044  
 1 -4.947090 -3.130087 1.363429  
 1 -4.116597 -1.145040 2.710021  
 6 -1.672950 -0.091750 -2.384507  
 6 -1.672950 0.091756 2.384505
